# Supplementary material
Source: ML conference proceedings conference paper supplement (https://proceedings.mlr.press/v37/aybat15.html)
Supplement: Supplementary file 1 [file aybat15-supp.pdf]

## 4. Supplementary File

### 4.1. Proof of Lemma 1

*Proof.* Let  $\mathbf{x} \in \mathbb{R}^{nN}$  and  $g_i \in \partial\rho_i(x_i)$  for all  $i \in \mathcal{N}$ . From convexity of  $\rho_i$  and Cauchy-Schwarz, it follows that  $\rho_i(x_i) \leq \rho(\bar{x}_i) + \|g_i\|_2 \|x_i - \bar{x}_i\|_2$  for all  $i \in \mathcal{N}$ . Hence, we have

$$\lambda\bar{\rho}(\mathbf{x}) + f(\mathbf{x}) \leq \lambda\rho(\bar{\mathbf{x}}) + f(\bar{\mathbf{x}}) + \sum_{i \in \mathcal{N}} \left( \lambda B_i \|x_i - \bar{x}_i\|_2 + \nabla_{x_i} f(\bar{\mathbf{x}})^\top (x_i - \bar{x}_i) + \frac{L_i}{2} \|x_i - \bar{x}_i\|_2^2 \right).$$

Minimizing on both sides and using the separability of the right side, we have  $\min_{\mathbf{x} \in \mathbb{R}^{nN}} \lambda\bar{\rho}(\mathbf{x}) + f(\mathbf{x}) \leq \lambda\bar{\rho}(\bar{\mathbf{x}}) + f(\bar{\mathbf{x}}) + \sum_{i \in \mathcal{N}} \min_{x_i \in \mathbb{R}^n} h_i(x_i)$ , where  $h_i(x_i) := \nabla_{x_i} f(\bar{\mathbf{x}})^\top (x_i - \bar{x}_i) + \lambda B_i \|x_i - \bar{x}_i\|_2 + \frac{L_i}{2} \|x_i - \bar{x}_i\|_2^2$ . Let  $\bar{x}_i^* := \operatorname{argmin}_{x_i \in \mathbb{R}^n} h_i(x_i)$ . Then the first-order optimality conditions imply that  $0 \in \nabla_{x_i} f(\bar{\mathbf{x}}) + L_i(\bar{x}_i^* - \bar{x}_i) + \lambda B_i \partial\|x_i - \bar{x}_i\|_2 \Big|_{x_i = \bar{x}_i^*}$  for all  $i \in \mathcal{N}$ .

Let  $\mathcal{I} := \{i \in \mathcal{N} : \|\nabla_{x_i} f(\bar{\mathbf{x}})\|_2 \leq \lambda B_i\}$ . For each  $i \in \mathcal{N}$ , there are two possibilities.

**Case 1:** Suppose that  $i \in \mathcal{I}$ , i.e.,  $\|\nabla_{x_i} f(\bar{\mathbf{x}})\|_2 \leq \lambda B_i$ . Since  $\min_{x_i \in \mathbb{R}^n} h_i(x_i)$  has a unique solution, and  $-\nabla_{x_i} f(\bar{\mathbf{x}}) \in \lambda B_i \partial\|x_i - \bar{x}_i\|_2 \Big|_{x_i = \bar{x}_i}$  when  $\|\nabla_{x_i} f(\bar{\mathbf{x}})\|_2 \leq \lambda B_i$ , it follows that  $\bar{x}_i^* = \bar{x}_i$  if and only if  $\|\nabla_{x_i} f(\bar{\mathbf{x}})\|_2 \leq \lambda B_i$ . Hence,  $h_i(\bar{x}_i^*) = 0$ .

**Case 2:** Suppose that  $i \in \mathcal{I}^c := \mathcal{N} \setminus \mathcal{I}$ , i.e.,  $\|\nabla_{x_i} f(\bar{\mathbf{x}})\|_2 > \lambda B_i$ . In this case,  $\bar{x}_i^* \neq \bar{x}_i$ . From the first-order optimality condition, we have  $\nabla_{x_i} f(\bar{\mathbf{x}}) + L_i(\bar{x}_i^* - \bar{x}_i) + \lambda B_i \frac{\bar{x}_i^* - \bar{x}_i}{\|\bar{x}_i^* - \bar{x}_i\|_2} = 0$ . Let  $s_i := \frac{\bar{x}_i^* - \bar{x}_i}{\|\bar{x}_i^* - \bar{x}_i\|_2}$  and  $t_i := \|\bar{x}_i^* - \bar{x}_i\|_2$ , then  $s_i = \frac{-\nabla_{x_i} f(\bar{\mathbf{x}})}{L_i t_i + \lambda B_i}$ . Since  $\|s_i\|_2 = 1$ , it follows that  $t_i = \frac{\|\nabla_{x_i} f(\bar{\mathbf{x}})\|_2 - \lambda B_i}{L_i} > 0$ , and  $s_i = \frac{-\nabla_{x_i} f(\bar{\mathbf{x}})}{\|\nabla_{x_i} f(\bar{\mathbf{x}})\|_2}$ . Hence,  $\bar{x}_i^* = \bar{x}_i - \frac{\|\nabla_{x_i} f(\bar{\mathbf{x}})\|_2 - \lambda B_i}{L_i} \frac{\nabla_{x_i} f(\bar{\mathbf{x}})}{\|\nabla_{x_i} f(\bar{\mathbf{x}})\|_2}$ , and  $h_i(\bar{x}_i^*) = -\frac{(\|\nabla_{x_i} f(\bar{\mathbf{x}})\|_2 - \lambda B_i)^2}{2L_i}$ .

From the  $\alpha$ -optimality of  $\bar{\mathbf{x}}$ , it follows that

$$\sum_{i \in \mathcal{I}} \frac{(\|\nabla_{x_i} f(\bar{\mathbf{x}})\|_2 - \lambda B_i)^2}{2L_i} = -\sum_{i \in \mathcal{I}} h_i(\bar{x}_i^*) \leq \lambda\bar{\rho}(\bar{\mathbf{x}}) + f(\bar{\mathbf{x}}) - \min_{\mathbf{x} \in \mathbb{R}^{nN}} \lambda\bar{\rho}(\mathbf{x}) + f(\mathbf{x}) \leq \alpha,$$

which implies that  $\|\nabla_{x_i} f(\bar{\mathbf{x}})\|_2 \leq \sqrt{2L_i\alpha} + \lambda B_i$  for all  $i \in \mathcal{I}$ . Moreover,  $\|\nabla_{x_i} f(\bar{\mathbf{x}})\|_2 \leq \lambda B_i$  for all  $i \in \mathcal{I}^c$ . Hence, the result follows from these two inequalities.  $\square$

### 4.2. Proof of Lemma 2

*Proof.* For all  $i \in \mathcal{N}$ , since  $\nabla\gamma_i$  is Lipschitz continuous with constant  $L_{\gamma_i}$ , for any  $\mathbf{x}, \bar{\mathbf{x}} \in \mathbb{R}^{nN}$ , we have  $\gamma_i(x_i) \leq \gamma_i(\bar{x}_i) + \nabla\gamma_i(\bar{x}_i)^\top (x_i - \bar{x}_i) + \frac{L_{\gamma_i}}{2} \|x_i - \bar{x}_i\|_2^2$ . Then, it follows that

$$\begin{aligned} \bar{\gamma}(\mathbf{x}) &\leq \sum_{i=1}^N \gamma_i(\bar{x}_i) + \nabla\gamma_i(\bar{x}_i)^\top (x_i - \bar{x}_i) + \frac{L_{\gamma_i}}{2} \|x_i - \bar{x}_i\|_2^2 \\ &\leq \bar{\gamma}(\bar{\mathbf{x}}) + \nabla\bar{\gamma}(\bar{\mathbf{x}})^\top (\mathbf{x} - \bar{\mathbf{x}}) + \sum_{i=1}^N \frac{L_{\gamma_i}}{2} \|x_i - \bar{x}_i\|_2^2. \end{aligned} \quad (15)$$

Let  $h^{(k)}(\mathbf{x}) = \frac{1}{2} \|\mathbf{A}\mathbf{x} - \mathbf{b} - \lambda^{(k)}\theta^{(k)}\|_2^2$ . It follows that  $\nabla h^{(k)}$  is Lipschitz continuous with constant  $\sigma_{\max}^2(A)$ . Since  $f^{(k)} = \lambda^{(k)}\bar{\gamma} + h^{(k)}$ , the result follows from (15).  $\square$

### 4.3. Proof of Lemma 3

*Proof.* Fix  $k \geq 1$ . Suppose that  $\mathbf{x}^{(k)}$  satisfies (9)(a). Then Lemma 1 implies that for all  $i \in \mathcal{N}$

$$\|\nabla_{x_i} f^{(k)}(\mathbf{x}^{(k)})\|_2 = \|\lambda^{(k)} \nabla\gamma_i(x_i^{(k)}) + A_i^\top (\mathbf{A}\mathbf{x}^{(k)} - \mathbf{b} - \lambda^{(k)}\theta^{(k)})\|_2 \leq \sqrt{2L_i^{(k)}\alpha^{(k)}} + \lambda^{(k)} B_i.$$

Now, suppose that  $\mathbf{x}^{(k)}$  satisfies (9)(b). Then triangular inequality immediately implies that  $\|\nabla_{x_i} f^{(k)}(\mathbf{x}^{(k)})\|_2 \leq \xi^{(k)}/\sqrt{N} + \lambda^{(k)} B_i$  for all  $i \in \mathcal{N}$ . Combining the two inequalities, and further using triangular Cauchy-Schwarz inequalities, it follows for all  $i \in \mathcal{N}$  that  $\|A\mathbf{x}^{(k)} - b - \lambda^{(k)}\theta^{(k)}\|_2 \leq \frac{\max\left\{\sqrt{2L_i^{(k)}\alpha_k}, \xi^{(k)}/\sqrt{N}\right\} + \lambda^{(k)}(B_i + \|\nabla\gamma(x_i^{(k)})\|_2)}{\sigma_{\min}(A_i)}$ . Hence, we conclude by dividing the above inequality by  $\lambda^{(k)}$  and using the definition of  $\theta^{(k+1)}$ .  $\square$

#### 4.4. Proof of Theorem 1

*Proof.* Let  $A = [A_1, A_2, \dots, A_N] \in \mathbb{R}^{m \times nN}$  such that  $A_i \in \mathbb{R}^{m \times n}$  for all  $i \in \mathcal{N}$ . Throughout the proof we assume that  $\sigma_{\max}(A) \geq \sqrt{\max_{i \in \mathcal{N}} d_i + 1}$ , and  $\sigma_{\min}(A_i) = \sqrt{d_i} \geq 1$  for all  $i \in \mathcal{N}$ , where  $d_i \geq 1$  is the degree of  $i \in \mathcal{N}$ . Indeed, when  $A$  is chosen as described in Section 2.2.3 corresponding to graph  $\mathcal{G}$ , recall that we showed  $\sigma_{\max}^2(A) = \psi_1$ , where  $\psi_1$  is the largest eigenvalue of the Laplacian  $\Omega$  corresponding to  $\mathcal{G}$ . It is shown in (Grone & Merris, 1994) that when  $\mathcal{G}$  is connected, one has  $\psi_1 \geq \max_{i \in \mathcal{N}} d_i + 1 > 1$ . Hence,  $\sigma_{\max}(A) \geq \sqrt{\max_{i \in \mathcal{N}} d_i + 1} > 1$ . Moreover, for  $A$  chosen as described in Section 2.2.3 corresponding to graph  $\mathcal{G}$ , again recall that  $\sigma_{\min}(A_i) = \sqrt{d_i}$  for all  $i \in \mathcal{N}$ .

To keep notation simple, without loss of generality, we assume that  $\gamma_i = 0$  for all  $i \in \mathcal{N}$ . Hence,  $\bar{\gamma}(\mathbf{x}) \geq 0$  for all  $\mathbf{x} \in \mathbb{R}^{nN}$ . Let  $\mathbf{x}^*$  be a minimizer of (6). By Lipschitz continuity of  $\nabla\gamma_i$ , we have for all  $i \in \mathcal{N}$

$$\|\nabla\gamma(x_i)\|_2 \leq L_{\gamma_i} \|x_i - x_i^*\|_2 + \|\nabla\gamma_i(x_i^*)\|_2. \quad (16)$$

We prove the theorem using induction. We show that, for an appropriately chosen bound  $R$ ,  $\|\mathbf{x}^{(k)} - \mathbf{x}^*\|_2 \leq R$  implies that  $\|\mathbf{x}^{(k+1)} - \mathbf{x}^*\|_2 \leq R$ , for all  $k \geq 1$ . Fix  $k \geq 1$ . First, suppose that  $\mathbf{x}^{(k+1)}$  satisfies (9)(a), i.e.  $P^{(k+1)}(\mathbf{x}^{(k+1)}) \leq P^{(k+1)}(\mathbf{x}^*) + \alpha^{(k+1)}$ . By dividing both sides by  $\lambda^{(k+1)}$ , it follows from Assumption 1,  $A\mathbf{x}^* = b$ , and  $f^{(k+1)}(\cdot) \geq 0$  that

$$\bar{\tau}\|\mathbf{x}^{(k+1)}\|_2 \leq \bar{\rho}(\mathbf{x}^*) + \bar{\gamma}(\mathbf{x}^*) + \frac{\lambda^{(k+1)}}{2} \left( \|\theta^{(k+1)}\|_2^2 + \frac{\alpha^{(k+1)}}{(\lambda^{(k+1)})^2} \right). \quad (17)$$

Next, suppose  $\mathbf{x}^{(k+1)}$  satisfies (9)(b). It follows from convexity of  $P^{(k+1)}$  and Cauchy-Schwarz inequality that  $P^{(k+1)}(\mathbf{x}^{(k+1)}) \leq P^{(k+1)}(\mathbf{x}^*) + \xi^{(k+1)}\|\mathbf{x}^{(k+1)} - \mathbf{x}^*\|_2$ . Again, dividing both sides by  $\lambda^{(k+1)}$ , we get

$$\bar{\tau}\|\mathbf{x}^{(k+1)}\|_2 \leq \bar{\rho}(\mathbf{x}^*) + \bar{\gamma}(\mathbf{x}^*) + \frac{\lambda^{(k+1)}}{2} \|\theta^{(k+1)}\|_2^2 + \frac{\xi^{(k+1)}}{\lambda^{(k+1)}} \|\mathbf{x}^{(k+1)} - \mathbf{x}^*\|_2. \quad (18)$$

Combining the bounds for both cases, (17) and (18), and using triangular inequality, we have

$$\left( \bar{\tau} - \frac{\xi^{(k+1)}}{\lambda^{(k+1)}} \right) \|\mathbf{x}^{(k+1)} - \mathbf{x}^*\|_2 \leq \bar{F}^* + \bar{\tau}\|\mathbf{x}^*\|_2 + \frac{\lambda^{(k+1)}}{2} \left( \|\theta^{(k+1)}\|_2^2 + \frac{\alpha^{(k+1)}}{(\lambda^{(k+1)})^2} \right), \quad (19)$$

for all  $k \geq 0$ . Note that  $\{\lambda^{(k)}, \alpha^{(k)}, \xi^{(k)}\}$  is chosen in **DFAL** such that  $\frac{\alpha^{(k)}}{(\lambda^{(k)})^2} = \frac{\alpha^{(1)}}{(\lambda^{(1)})^2}$  for all  $k > 1$ , and both  $\frac{\xi^{(k)}}{\lambda^{(k)}} \searrow 0$  and  $\lambda^{(k)} \searrow 0$  monotonically. Since  $\sigma_{\min}(A_i) \geq 1$  for all  $i \in \mathcal{N}$ , the inductive assumption  $\|\mathbf{x}^{(k)} - \mathbf{x}^*\|_2 \leq R$ , (16), and Lemma 3 together imply that

$$\|\theta^{(k+1)}\|_2 \leq \min_{i \in \mathcal{N}} \left\{ \max \left\{ \sqrt{2L_i^{(1)} \frac{\alpha^{(1)}}{(\lambda^{(1)})^2}}, \frac{\xi^{(1)}}{\lambda^{(1)}} \right\} + B_i + \|\nabla\gamma_i(x_i^*)\|_2 + L_{\gamma_i} R \right\}. \quad (20)$$

To simplify bounds further, choose  $\alpha^{(1)} = \frac{1}{4N} (\lambda^{(1)}\bar{\tau})^2$ , and  $\xi^{(1)} = \frac{1}{2}\lambda^{(1)}\bar{\tau}$  for  $\lambda^{(1)} \leq \sigma_{\max}^2(A)/\bar{L}$ , where  $\bar{L} = \max_{i \in \mathcal{N}} \{L_{\gamma_i}\}$ . Let  $\bar{B} := \max_{i \in \mathcal{N}} B_i$  and  $\bar{G} := \max\{\|\nabla\gamma_i(x_i^*)\|_2 : i \in \mathcal{N}\}$ . Together with (19), (20) and  $\sigma_{\max}(A) \geq 1$ , this choice of parameters implies that

$$\frac{\bar{\tau}}{2} \|\mathbf{x}^{(k+1)} - \mathbf{x}^*\|_2 \leq \bar{F}^* + \bar{\tau}\|\mathbf{x}^*\|_2 + \frac{\lambda^{(1)}}{2} \left[ \left( \frac{\bar{\tau}\sigma_{\max}(A)}{\sqrt{N}} + \bar{B} + \bar{G} + \bar{L}R \right)^2 + \frac{\bar{\tau}^2}{4N} \right].$$

Define  $\beta_1 := \frac{2}{\bar{\tau}} (\bar{F}^* + \bar{\tau}\|\mathbf{x}^*\|_2)$ ,  $\beta_2 := \frac{\bar{\tau}\sigma_{\max}(A)/\sqrt{N} + \bar{B} + \bar{G}}{\sqrt{\bar{\tau}}}$ ,  $\beta_3 := \frac{\bar{L}}{\sqrt{\bar{\tau}}}$ , and  $\beta_4 := \frac{\bar{\tau}}{4N}$ . Then we have that  $\|\mathbf{x}^{(k+1)} - \mathbf{x}^*\|_2 \leq \beta_1 + \lambda^{(1)} \left[ (\beta_2 + \beta_3 R)^2 + \beta_4 \right]$ .

Note that we are free to choose any  $\lambda^{(1)} > 0$  satisfying  $\lambda^{(1)} \leq \sigma_{\max}^2(A)/\bar{L}$ . Our objective is to show that by appropriately choosing  $\lambda^{(1)}$ , we can guarantee that  $\beta_1 + \lambda^{(1)} \left[ (\beta_2 + \beta_3 R)^2 + \beta_4 \right] \leq R$ , which would then complete the inductive proof. This is indeed true if the above quadratic inequality in  $R$ , has a solution, or equivalently if the discriminant

$$\Delta = (2\lambda^{(1)}\beta_2\beta_3 - 1)^2 - 4\lambda^{(1)}\beta_3^2[\lambda^{(1)}(\beta_2^2 + \beta_4) + \beta_1]$$

is non-negative. Note that  $\Delta$  is continuous in  $\lambda^{(1)}$ , and  $\lim_{\lambda^{(1)} \rightarrow 0} \Delta = 1$ . Thus, for all sufficiently small  $\lambda^{(1)} > 0$ , we have  $\Delta \geq 0$ . Hence, we can set  $R = \frac{1-2\lambda^{(1)}\beta_2\beta_3-\sqrt{\Delta}}{2\lambda^{(1)}\beta_3^2}$  for some  $\lambda^{(1)} > 0$  such that  $\Delta \geq 0$ , and this will imply that  $\|\mathbf{x}^{(k+1)} - \mathbf{x}^*\|_2 \leq R$  whenever  $\|\mathbf{x}^{(k)} - \mathbf{x}^*\|_2 \leq R$  for all  $k \geq 1$ .

The induction will be complete if we can show that  $\|\mathbf{x}^{(1)} - \mathbf{x}^*\|_2 \leq R$ . Note that in **DFAL** we set  $\theta^{(1)} = \mathbf{0}$ . Hence, for  $k = 0$ , (19) implies that  $\|\mathbf{x}^{(1)} - \mathbf{x}^*\|_2 \leq \beta_1 + \lambda^{(1)}\beta_4$ . Hence, our choice of  $R$  guarantees that  $\|\mathbf{x}^{(1)} - \mathbf{x}^*\|_2 \leq R$ . This completes the induction.

Following the same arguments leading to (19), it can also be shown that for all  $k \geq 0$

$$\left( \bar{\tau} - \frac{\xi^{(k+1)}}{\lambda^{(k+1)}} \right) \|\mathbf{x}_*^{(k+1)} - \mathbf{x}^*\|_2 \leq \bar{F}^* + \bar{\tau} \|\mathbf{x}^*\|_2 + \frac{\lambda^{(k+1)}}{2} \|\theta^{(k+1)}\|_2^2.$$

Therefore, we can conclude that  $\|\mathbf{x}_*^{(k)} - \mathbf{x}^*\|_2 \leq R$  for all  $k \geq 1$  holds for the same  $R$  we selected above.

Note that  $\Delta$  is a concave quadratic of  $\lambda^{(1)}$  such that  $\Delta = 1$  when  $\lambda^{(1)} = 0$ ; hence, one of its roots is positive and the other one is negative. Moreover,  $R \leq \frac{1}{2\lambda^{(1)}\beta_3^2} - \frac{\beta_2}{\beta_3}$  and the bound on  $R$  is decreasing in  $\lambda^{(1)} > 0$ . Hence, in order to get a smaller bound on  $R$ , we will choose  $\lambda^{(1)}$  as the positive root of  $\Delta$ . In particular, we set  $\lambda^{(1)} = \frac{\sqrt{(\beta_2 + \beta_3\beta_1)^2 + \beta_4} - (\beta_2 + \beta_3\beta_1)}{2\beta_3\beta_4}$ .  $\square$

#### 4.5. Proof of Theorem 2

*Proof.* The proof directly follows from Theorem 3.3 in (Aybat & Iyengar, 2012). For the sake of completeness, we also provide the proof here. Let  $\mathbf{x}^*$  denote an optimal solution to (6).

Note that (a) follows immediately from Cauchy-Schwarz and the definition of  $\theta^{(k+1)}$ .

$$\|A\mathbf{x}^{(k)} - b\|_2 \leq \|A\mathbf{x}^{(k)} - b - \lambda^{(k)}\theta^{(k)}\|_2 + \lambda^{(k)}\|\theta^{(k)}\|_2 = \lambda^{(k)}(\|\theta^{(k+1)}\|_2 + \|\theta^{(k)}\|_2) \leq 2B_\theta\lambda^{(k)}.$$

First, we prove the second inequality in (b). Suppose that  $\mathbf{x}^{(k)}$  satisfies (9)(a), which implies that  $\bar{F}(\mathbf{x}^{(k)}) + \frac{\lambda^{(k)}}{2}\|\theta^{(k+1)}\|_2^2 \leq \bar{F}(\mathbf{x}^*) + \frac{\lambda^{(k)}}{2}\|\theta^{(k)}\|_2^2 + \frac{\alpha^{(k)}}{\lambda^{(k)}}$ . Now, suppose that  $\mathbf{x}^{(k)}$  satisfies (9)(b). From the convexity of  $P^{(k)}$  and Cauchy-Schwarz, it follows that  $P^{(k)}(\mathbf{x}^{(k)}) \leq P^{(k)}(\mathbf{x}^*) + \xi^{(k)}\|\mathbf{x}^{(k)} - \mathbf{x}^*\|_2$ . Hence, dividing it by  $\lambda^{(k)}$ , we have  $\bar{F}(\mathbf{x}^{(k)}) + \frac{\lambda^{(k)}}{2}\|\theta^{(k+1)}\|_2^2 \leq \bar{F}(\mathbf{x}^*) + \frac{\lambda^{(k)}}{2}\|\theta^{(k)}\|_2^2 + \frac{\xi^{(k)}}{\lambda^{(k)}}$ . Therefore, for all  $k \geq 1$ ,  $\mathbf{x}^{(k)}$  satisfies the second inequality in (b) since it also satisfies

$$\bar{F}(\mathbf{x}^{(k)}) - \bar{F}^* \leq \lambda^{(k)} \left( \frac{\|\theta^{(k)}\|_2^2 - \|\theta^{(k+1)}\|_2^2}{2} + \frac{\max\{\alpha^{(k)}, \xi^{(k)}\|\mathbf{x}^{(k)} - \mathbf{x}^*\|_2\}}{(\lambda^{(k)})^2} \right).$$

Now, in order to prove the first inequality in (b), we will exploit the primal-dual relations of the following two pairs of problems:

$$\begin{aligned} (\mathcal{P}) : \min_{\mathbf{x} \in \mathbb{R}^{nN}} \{ \bar{F}(\mathbf{x}) : A\mathbf{x} = b \}, & \quad (\mathcal{D}) : \max_{\theta \in \mathbb{R}^m} b^\top \theta - \bar{F}^*(A^\top \theta), \\ (\mathcal{P}_k) : \min_{\mathbf{x} \in \mathbb{R}^{nN}} \lambda^{(k)} \bar{F}(\mathbf{x}) + \frac{1}{2} \|A\mathbf{x} - b_k\|_2^2, & \quad (\mathcal{D}_k) : \max_{\theta \in \mathbb{R}^m} \lambda^{(k)} (b^\top \theta - \bar{F}^*(A^\top \theta)) - \frac{(\lambda^{(k)})^2}{2} h(\theta), \end{aligned}$$

where  $b_k := b + \lambda^{(k)}\theta^{(k)}$ ,  $h(\theta) := \|\theta - \theta^{(k)}\|_2^2 - \|\theta^{(k)}\|_2^2$ , and  $\bar{F}^*$  denotes the convex conjugate of  $\bar{F}$ . Note that problem  $(\mathcal{P}_k)$  is nothing but the subproblem in (7). Therefore, from weak-duality between  $(\mathcal{P}_k)$  and  $(\mathcal{D}_k)$ , it follows that

$$P^{(k)}(\mathbf{x}^{(k)}) = \lambda^{(k)} \bar{F}(\mathbf{x}^{(k)}) + \frac{1}{2} \|A\mathbf{x}^{(k)} - b_k\|_2^2 \geq \lambda^{(k)} (b^\top \theta^* - \bar{F}^*(A^\top \theta^*)) - \frac{(\lambda^{(k)})^2}{2} h(\theta^*).$$

Note that from strong duality between  $(\mathcal{P})$  and  $(\mathcal{D})$ , it follows that  $\bar{F}^* = \bar{F}(\mathbf{x}^*) = b^\top \theta^* - \bar{F}^*(A^\top \theta^*)$ . Therefore, dividing the above inequality by  $\lambda^{(k)}$ , we obtain

$$\bar{F}(\mathbf{x}^{(k)}) - \bar{F}^* \geq -\frac{\lambda^{(k)}}{2} \left( \|\theta^*\|_2^2 - 2(\theta^*)^\top \theta^{(k)} + \|\theta^{(k+1)}\|_2^2 \right) \geq -\frac{\lambda^{(k)}}{2} (\|\theta^*\|_2 + B_\theta)^2.$$

$\square$

#### 4.6. Proof of Theorem 3

*Proof.* We assume that  $\sigma_{\max}(A) \geq \sqrt{\max_{i \in \mathcal{N}} d_i + 1}$ , and  $\sigma_{\min}(A_i) = \sqrt{d_i} \geq 1$  for all  $i \in \mathcal{N}$ , where  $d_i$  denotes the degree of  $i \in \mathcal{N}$ . As discussed in the proof of Theorem 1, this is a valid assumption for distributed optimization problem in (4). Let  $\theta^*$  denote an optimal dual solution to (6). Note that from the first-order optimality conditions for (6), we have  $0 \in \nabla \gamma_i(x_i^*) + A_i^\top \theta^* + \partial \rho_i(x_i) |_{x_i=x_i^*}$ ; hence,  $\|A_i^\top \theta^*\|_2 \leq B_i + G_i$ . Therefore,  $\|\theta^*\|_2 \leq \min_{i \in \mathcal{N}} \frac{B_i + G_i}{\sigma_{\min}(A_i)}$ .

Given  $0 < \lambda^{(1)} \leq \sigma_{\max}^2(A)/\bar{L}$ , choose  $\alpha^{(1)}, \xi^{(1)} > 0$  such that  $\alpha^{(1)} = \frac{1}{4N} (\lambda^{(1)} \bar{\tau})^2$ , and  $\xi^{(1)} = \frac{1}{2} \lambda^{(1)} \bar{\tau}$ . Then Lemma 3 and  $\sigma_{\max}(A) \geq 1$  together imply that for all  $k \geq 1$

$$\|\theta^{(k)}\|_2 \leq \min_{i \in \mathcal{N}} \left\{ \frac{\bar{\tau} \sigma_{\max}(A) / \sqrt{N} + B_i + G_i}{\sigma_{\min}(A_i)} \right\} := B_\theta. \quad (21)$$

Hence, note that  $\|\theta^*\|_2 \leq B_\theta$ .

To simplify notation, suppose that  $\lambda^{(1)} = \min\{1, \sigma_{\max}^2(A)/\bar{L}\} = 1$ . (19) implies that for all  $k \geq 1$

$$\|\mathbf{x}^{(k)} - \mathbf{x}^*\|_2 \leq \frac{2}{\bar{\tau}} \left[ \bar{F}^* + \bar{\tau} \|x^*\|_2 + \frac{1}{2} \left( B_\theta^2 + \frac{\bar{\tau}^2}{4N} \right) \right] := B_x. \quad (22)$$

Note that (22) implies that  $\frac{\xi^{(1)}}{(\lambda^{(1)})^2} B_x = \frac{1}{\lambda^{(1)}} \frac{\bar{\tau}}{2} B_x \geq \frac{1}{2} B_\theta^2 + \frac{\bar{\tau}^2}{8N} \geq \frac{5}{8N} \bar{\tau}^2 \geq \frac{\alpha^{(1)}}{(\lambda^{(1)})^2}$ , where we used the fact  $B_\theta \geq \frac{\sigma_{\max}(A)}{\max_{i \in \mathcal{N}} \{\sigma_{\min}(A_i)\}} \frac{\bar{\tau}}{\sqrt{N}} \geq \frac{\bar{\tau}}{\sqrt{N}}$ . Note that the last inequality follows from our assumption on  $A$  stated at the beginning of the proof, i.e.  $\sigma_{\max}(A) \geq \sqrt{\max_{i \in \mathcal{N}} d_i + 1}$  and  $\sigma_{\min}(A_i) = d_i$  for all  $i \in \mathcal{N}$ . Hence, Theorem 2,  $\lambda^{(1)} = 1$ , and  $\|\theta^*\|_2 \leq B_\theta$  imply that

$$N_{\text{DFAL}}^f(\epsilon) \leq \log_{\frac{1}{c}} \left( \frac{2B_\theta}{\epsilon} \right) = \log_{\frac{1}{c}} \left( 2 \min_{i \in \mathcal{N}} \left\{ \frac{\bar{\tau} \sigma_{\max}(A) / \sqrt{N} + B_i + G_i}{\sigma_{\min}(A_i) \epsilon} \right\} \right) := \bar{N}^f, \quad (23)$$

$$\begin{aligned} N_{\text{DFAL}}^o(\epsilon) &\leq \log_{\frac{1}{c}} \left( \frac{1}{\epsilon} \max \left\{ \frac{1}{2} (\|\theta^*\|_2 + B_\theta)^2, B_\theta^2 + \bar{F}^* + \bar{\tau} \|x^*\|_2 + \frac{\bar{\tau}^2}{8N} \right\} \right), \\ &= \log_{\frac{1}{c}} \left( \frac{2B_\theta^2 + \bar{F}^* + \bar{\tau} \|x^*\|_2 + \frac{\bar{\tau}^2}{8N}}{\epsilon} \right) := \bar{N}^o. \end{aligned} \quad (24)$$

Since  $\alpha^{(1)} = \frac{1}{4N} (\lambda^{(1)} \bar{\tau})^2$ , we have  $\sqrt{\alpha^{(k)}} = \frac{\bar{\tau}}{\sqrt{4N}} c^k$ . Hence, Lemma 5 implies that

$$N^{(k)} \leq 2B_x \sqrt{\frac{2(\lambda^{(k)} \bar{L} + \sigma_{\max}^2(A))}{\alpha^{(k)}}} \leq \frac{8B_x \sqrt{N}}{\bar{\tau}} \sigma_{\max}(A) c^{-k}. \quad (25)$$

Hence, (23) and (25) imply that the total number of **MS-APG** iterations to compute an  $\epsilon$ -feasible solution can be bounded above:

$$\begin{aligned} \sum_{k=1}^{N_{\text{DFAL}}^f(\epsilon)} N^{(k)} &\leq \frac{8B_x \sqrt{N}}{\bar{\tau}} \sigma_{\max}(A) \sum_{k=1}^{\bar{N}^f} c^{-k} \leq \frac{8B_x \sqrt{N}}{c(1-c)\bar{\tau}} \sigma_{\max}(A) \left( \frac{1}{c} \right)^{\bar{N}^f}, \\ &\leq \frac{16B_x \sqrt{N}}{c(1-c)\bar{\tau}} \min_{i \in \mathcal{N}} \left\{ \frac{\bar{\tau} \sigma_{\max}(A) / \sqrt{N} + B_i + G_i}{\sigma_{\min}(A_i) \epsilon} \right\} \frac{\sigma_{\max}(A)}{\epsilon} = \mathcal{O} \left( \frac{\sigma_{\max}^2(A)}{\min_{i \in \mathcal{N}} \sigma_{\min}(A_i)} \frac{1}{\epsilon} \right). \end{aligned}$$

Similarly, (24) and (25) imply that the total number of **MS-APG** iterations to compute an  $\epsilon$ -optimal solution can be bounded above:

$$\sum_{k=1}^{N_{\text{DFAL}}^o(\epsilon)} N^{(k)} \leq \frac{8B_x \sqrt{N}}{c(1-c)\bar{\tau}} \sigma_{\max}(A) \left( \frac{1}{c} \right)^{\bar{N}^o} = \mathcal{O} \left( \frac{\sigma_{\max}^3(A)}{\min_{i \in \mathcal{N}} \sigma_{\min}^2(A_i)} \frac{1}{\epsilon} \right). \quad (26)$$

□

#### 4.7. Proof of Lemma 6

*Proof.* Given any convex function  $\rho : \mathbb{R}^n \rightarrow \mathbb{R}$  and  $\bar{x} \in \mathbb{R}^n$ , in order to simplify the notation throughout the proof,  $\partial\rho(x)|_{x=\bar{x}} \subset \mathbb{R}^n$ , the subdifferential of  $\rho$  at  $\bar{x}$ , will be written as  $\partial\rho(\bar{x})$ . Given  $\bar{x} \in \mathbb{R}^n$ , there exists  $\nu \in \partial P(\bar{x})$  such that  $\|\nu\|_2 \leq \xi$ , if and only if  $\|\nu^*\| \leq \xi$ , where  $\nu^* = \operatorname{argmin}\{\|\nu\|_2 : \nu \in \partial P(\bar{x})\}$ . Note that  $\partial P(\bar{x}) = \lambda\partial\rho(\bar{x}) + \nabla f(\bar{x})$ , and

$$\partial\rho(\bar{x}) = \beta_1 \prod_{k=1}^K \partial\|\bar{x}_{g(k)}\|_1 + \beta_2 \prod_{k=1}^K \partial\|\bar{x}_{g(k)}\|_2, \quad (27)$$

where  $\prod$  denotes the Cartesian product. Since the groups  $\{g(k)\}_{k=1}^K$  are not overlapping with each other, the minimization problem is separable in groups. Hence, for all  $k \in [1, K]$ , we have  $\nu_{g(k)}^* = \pi_{g(k)}^* + \omega_{g(k)}^* + \nabla_{x_{g(k)}} f(\bar{x})$  such that

$$\begin{aligned} (\pi_{g(k)}^*, \omega_{g(k)}^*) &= \operatorname{argmin} \|\pi_{g(k)} + \omega_{g(k)} + \nabla_{x_{g(k)}} f(\bar{x})\|_2^2 \\ \text{s.t. } &\pi_{g(k)} \in \lambda\beta_1 \partial\|\bar{x}_{g(k)}\|_1, \quad \omega_{g(k)} \in \lambda\beta_2 \partial\|\bar{x}_{g(k)}\|_2. \end{aligned} \quad (28)$$

Fix  $k \in [1, K]$ . We will consider the solution to above problem in two cases. Suppose that  $\bar{x}_{g(k)} = \mathbf{0}$ . Since  $\partial\|\mathbf{0}\|_1$  is the unit  $\ell_\infty$ -ball, and  $\partial\|\mathbf{0}\|_2$  is the unit  $\ell_2$ -ball, (28) can be equivalently written as

$$\begin{aligned} (\pi_{g(k)}^*, \omega_{g(k)}^*) &= \operatorname{argmin} \|\pi_{g(k)} + \omega_{g(k)} + \nabla_{x_{g(k)}} f(\bar{x})\|_2^2 \\ \text{s.t. } &\|\pi_{g(k)}\|_\infty \leq \lambda\beta_1, \quad \|\omega_{g(k)}\|_2 \leq \lambda\beta_2. \end{aligned} \quad (29)$$

Clearly, it follows from Euclidean projection on to  $\ell_2$ -ball that

$$\omega_{g(k)}^* = -(\pi_{g(k)}^* + \nabla_{x_{g(k)}} f(\bar{x})) \min \left\{ 1, \frac{\lambda\beta_2}{\|\pi_{g(k)}^* + \nabla_{x_{g(k)}} f(\bar{x})\|_2} \right\}.$$

Hence,  $\|\pi_{g(k)}^* + \omega_{g(k)}^* + \nabla_{x_{g(k)}} f(\bar{x})\|_2 = \max\{0, \|\pi_{g(k)}^* + \nabla_{x_{g(k)}} f(\bar{x})\|_2 - \lambda\beta_2\}$ . Therefore,

$$\pi_{g(k)}^* = \operatorname{argmin}\{\|\pi_{g(k)} + \nabla_{x_{g(k)}} f(\bar{x})\|_2 : \|\pi_{g(k)}\|_\infty \leq \lambda\beta_1\} = -\operatorname{sgn}(\nabla_{x_{g(k)}} f(\bar{x})) \odot \min\{|\nabla_{x_{g(k)}} f(\bar{x})|, \lambda\beta_1\}.$$

Now, suppose that  $\bar{x}_{g(k)} \neq \mathbf{0}$ . This implies that  $\partial\|\bar{x}_{g(k)}\|_2 = \{\bar{x}_{g(k)}/\|\bar{x}_{g(k)}\|_2\}$ . Hence, when  $\bar{x}_{g(k)} \neq \mathbf{0}$ , we have  $\omega_{g(k)}^* = \lambda\beta_2 \bar{x}_{g(k)}/\|\bar{x}_{g(k)}\|_2$ , and the structure of  $\partial\|\cdot\|_1$  implies that  $\pi_j^* = \lambda\beta_1 \operatorname{sgn}(\bar{x}_j)$  for all  $j \in g(k)$  such that  $|\bar{x}_j| > 0$ ; and it follows from (28) that for all  $j \in g(k)$  such that  $\bar{x}_j = 0$ , we have

$$\pi_j^* = \operatorname{argmin} \left\{ \left( \pi_j + \frac{\partial}{\partial x_j} f(\bar{x}) \right)^2 : |\pi_j| \leq \lambda\beta_1 \right\} = -\operatorname{sgn} \left( \frac{\partial}{\partial x_j} f(\bar{x}) \right) \min \left\{ \left| \frac{\partial}{\partial x_j} f(\bar{x}) \right|, \lambda\beta_1 \right\}.$$

#### 4.8. Proof of Lemma 7

*Proof.* Since the groups are not overlapping with each other, the proximal problem becomes separable in groups. Let  $n_k := |g(k)|$  for all  $k$ . Thus, it suffices to show that  $\min_{x_{g(k)} \in \mathbb{R}^{n_k}} \{\beta_1 \|x\|_1 + \beta_2 \|x_{g(k)}\|_2 + \frac{1}{2t} \|x_{g(k)} - \bar{x}_{g(k)}\|_2^2\}$  has a closed form solution as shown in the statement for some fixed  $k$ . By the definition of dual norm, we have

$$\min_{x_{g(k)} \in \mathbb{R}^{n_k}} \beta_1 \|x_{g(k)}\|_1 + \beta_2 \|x_{g(k)}\|_2 + \frac{1}{2t} \|x_{g(k)} - \bar{x}_{g(k)}\|_2^2, \quad (30)$$

$$\begin{aligned} &= \min_{x_{g(k)} \in \mathbb{R}^{n_k}} \max_{\|u_1\|_\infty \leq \beta_1} u_1^\top x_{g(k)} + \max_{\|u_2\|_2 \leq \beta_2} u_2^\top x_{g(k)} + \frac{1}{2t} \|x_{g(k)} - \bar{x}_{g(k)}\|_2^2, \\ &= \max_{\|u_1\|_\infty \leq \beta_1} \min_{x \in \mathbb{R}^n} (u_1 + u_2)^\top x_{g(k)} + \frac{1}{2t} \|x_{g(k)} - \bar{x}_{g(k)}\|_2^2, \end{aligned} \quad (31)$$

$$= \max_{\substack{\|u_1\|_\infty \leq \beta_1 \\ \|u_2\|_2 \leq \beta_2}} (u_1 + u_2)^\top \bar{x}_{g(k)} - \frac{t}{2} \|u_1 + u_2\|_2^2. \quad (32)$$

Let  $(u_1^*, u_2^*)$  be the optimal solution of (32). Since  $x_{g(k)}^P$  is the optimal solution to (30), it follows from (31) that

$$x_{g(k)}^P = \bar{x}_{g(k)} - t(u_1^* + u_2^*). \quad (33)$$

Note that (32) can be equivalently written as  $\min\{\|u_1 + u_2 - \frac{1}{t}\bar{x}_{g(k)}\|_2^2 : \|u_1\|_\infty \leq \beta_1, \|u_2\|_2 \leq \beta_2\}$ . Minimizing over  $u_2$ , we have

$$u_2^*(u_1) = \left( \frac{1}{t}\bar{x}_{g(k)} - u_1 \right) \min \left\{ \frac{\beta_2}{\|\frac{1}{t}\bar{x}_{g(k)} - u_1\|_2}, 1 \right\}. \quad (34)$$

Hence, we have

$$u_1^* = \operatorname{argmin}_{\|u_1\|_\infty \leq \beta_1} \left\| \left( u_1 - \frac{1}{t}\bar{x}_{g(k)} \right) \max \left\{ 1 - \frac{\beta_2}{\|u_1 - \frac{1}{t}\bar{x}_{g(k)}\|_2}, 0 \right\} \right\|_2 = \operatorname{argmin}_{\|u_1\|_\infty \leq \beta_1} \max \{ \|u_1 - \frac{1}{t}\bar{x}_{g(k)}\|_2 - \beta_2, 0 \}.$$

Clearly,  $u_1^* = \operatorname{argmin}_{\|u_1\|_\infty \leq \beta_1} \|(u_1 - \frac{1}{t}\bar{x}_{g(k)})\|_2 = \operatorname{sgn}(\bar{x}_{g(k)}) \min \{ \frac{1}{t}|\bar{x}_{g(k)}|, \beta_1 \}$ . The final result follows from combining (33) and (34).  $\square$

#### 4.9. Improved rate for asynchronous DFAL

Let  $\mathcal{R}$  denote a discrete random variable uniformly distributed over the set  $\mathcal{N}$ . Let  $[U_1, U_2, \dots, U_N]$  denote a partition of the  $nN$ -dimensional identity matrix where  $U_i \in \mathbb{R}^{nN \times n}$ ,  $i = 1, \dots, N$ . In the rest, given  $\mathbf{h} \in \mathbb{R}^{nN}$ , we denote  $\mathbf{h}_{[\mathcal{R}]} := U_{\mathcal{R}} U_{\mathcal{R}}^\top \mathbf{h}$ . Consider the composite convex optimization problem

$$\Phi^* := \min_{\mathbf{y} \in \mathbb{R}^{nN}} \Phi(\mathbf{y}) := \sum_{i=1}^N \rho_i(y_i) + f(\mathbf{y}), \quad (35)$$

where  $\rho_i : \mathbb{R}^n \rightarrow \mathbb{R}$  is a closed convex function for all  $i \in \mathcal{N}$  such that  $\operatorname{prox}_{t\rho_i}$  can be computed efficiently for all  $t > 0$  and  $i \in \mathcal{N}$ , and  $f : \mathbb{R}^{nN} \rightarrow \mathbb{R}$  is a differentiable convex function such that for some  $\{L_i\}_{i \in \mathcal{N}} \subset \mathbb{R}_{++}$ ,  $f$  satisfies

$$\mathbb{E}[f(\mathbf{y} + \mathbf{h}_{[\mathcal{R}]})] \leq f(\mathbf{y}) + \frac{1}{N} \left( \langle \nabla f(\mathbf{y}), \mathbf{h} \rangle + \frac{1}{2} \sum_{i \in \mathcal{N}} L_i \|h_i\|_2^2 \right) \quad (36)$$

for all  $\mathbf{y}, \mathbf{h} \in \mathbb{R}^{nN}$ . Fercoq & Richtárik (2013) proposed the accelerated proximal coordinate descent algorithm **ARBCD** (see Figure 6) to solve (35). They showed that for a given  $\alpha > 0$ , the iterate sequence  $\{\mathbf{z}^{(\ell)}, \mathbf{u}^{(\ell)}\}$  computed by **ARBCD** satisfies

$$\mathbb{E} \left[ \Phi \left( \left( \frac{1}{Nt^{(\ell)}} \right)^2 \mathbf{u}^{(\ell+1)} + \mathbf{z}^{(\ell+1)} \right) - \Phi^* \right] \leq \alpha, \quad \forall \ell \geq 2N \sqrt{\frac{C}{\alpha}}, \quad (37)$$

where

$$C := \min_{\mathbf{y}^* \in \mathcal{Y}^*} \left( 1 - \frac{1}{N} \right) \left( \Phi(\mathbf{z}^{(0)}) - \Phi^* \right) + \frac{1}{2} \sum_{i \in \mathcal{N}} L_i \|z_i^{(0)} - y_i^*\|_2^2, \quad (38)$$

and  $\mathcal{Y}^*$  denotes the set of optimal solutions.

---

#### Algorithm ARBCD ( $\mathbf{z}^{(0)}$ )

---

- 1:  $\ell \leftarrow 0, \quad t^{(0)} \leftarrow 1, \quad u_i^{(1)} \leftarrow \mathbf{0}, \quad \forall i \in \mathcal{N}$
  - 2: **while**  $\ell \geq 0$  **do**
  - 3:  $i$  is a sample of  $\mathcal{R}$
  - 4:  $z_i^{(\ell+1)} \leftarrow \operatorname{prox}_{t^{(\ell)}\rho_i/L_i} \left( z_i^{(\ell)} - \frac{t^{(\ell)}}{L_i} \nabla_{y_i} f \left( \left( \frac{1}{Nt^{(\ell)}} \right)^2 \mathbf{u}^{(\ell)} + \mathbf{z}^{(\ell)} \right) \right)$
  - 5:  $u_i^{(\ell+1)} \leftarrow u_i^{(\ell)} + N^2 t^{(\ell)} (1 - t^{(\ell)}) \left( z_i^{(\ell+1)} - z_i^{(\ell)} \right)$
  - 6:  $z_{-i}^{(\ell+1)} \leftarrow z_{-i}^{(\ell)}, \quad u_{-i}^{(\ell+1)} \leftarrow u_{-i}^{(\ell)}$
  - 7:  $t^{(\ell+1)} \leftarrow \frac{1 + \sqrt{1 + (2Nt^{(\ell)})^2}}{2N}$
  - 8: **end while**
- 

Figure 6. Accelerated Randomized Proximal Block Coordinate Descent (ARBCD) algorithm

In the following result, we establish that the bound (36) can be exploited for designing an accelerated version of asynchronous **DFAL**.

**Lemma 8.** Fix  $\alpha > 0$ , and  $p \in (0, 1)$ . Let  $\{\mathbf{z}_k^{(\ell)}, \mathbf{u}_k^{(\ell)}\}_{\ell \in \mathbb{Z}_+, k = 1, \dots, K}$ , denote the iterate sequence corresponding to  $K := \log(1/p)$  independent calls to  $\mathbf{ARBCD}(\mathbf{y}^{(0)})$ . Define  $\mathbf{y}_k := \left(\frac{1}{Nt^{(T)}}\right)^2 \mathbf{u}_k^{(T+1)} + \mathbf{z}_k^{(T+1)}$  for  $k = 1, \dots, K$ , and  $T := 2N\sqrt{\frac{2C}{\alpha}}$ . Then

$$\mathbb{P}\left(\min_{k=1, \dots, K} \Phi(\mathbf{y}_k) - \Phi^* \leq \alpha\right) \geq 1 - p.$$

*Proof.* Since the sequence  $\{\mathbf{y}_k\}_{k=1}^K$  is i.i.d., and each  $\mathbf{y}_k$  satisfies  $\mathbb{E}[\Phi(\mathbf{y}_k) - \Phi^*] \leq \frac{\alpha}{2}$ , Markov's inequality implies that  $\mathbb{P}(\Phi(\mathbf{y}_k) - \Phi^* > \alpha) \leq \mathbf{E}[\Phi(\mathbf{y}_k) - \Phi^*]/\alpha \leq \frac{1}{2}$  for  $1 \leq k \leq K$ . Therefore, we have

$$\mathbb{P}\left(\min_{k=1, \dots, K} \Phi(\mathbf{y}_k) - \Phi^* \leq \alpha\right) = 1 - \prod_{k=1}^K \mathbb{P}(\Phi(\mathbf{y}_k) - \Phi^* > \alpha) \leq \left(\frac{1}{2}\right)^K = 1 - p.$$

□

From Lemma 8 it follows that we can compute  $\mathbf{y}_\alpha$  such that  $\mathbb{P}(\Phi(\mathbf{y}_\alpha) - \Phi^* \leq \alpha) \geq 1 - p$  in at most  $2N\sqrt{\frac{2C}{\alpha}} \log(\frac{1}{p})$   $\mathbf{ARBCD}$  iterations. This new oracle can be used to construct an asynchronous version of  $\mathbf{DFAL}$  algorithm with  $\mathcal{O}(1/\epsilon)$  complexity.

**Theorem 4.** Fix  $\epsilon > 0$  and  $p \in (0, 1)$ . Consider a asynchronous variant of  $\mathbf{DFAL}$  where (9)(a) in Figure 1 is replaced by

$$\mathbb{P}\left(P^{(k)}(\mathbf{x}^{(k)}) - P^{(k)}(\mathbf{x}_*^{(k)}) \leq \alpha^{(k)}\right) \geq (1 - p)^{\frac{1}{N(\epsilon)}}, \quad (39)$$

where  $N(\epsilon) = \log_{\frac{1}{\epsilon}}\left(\frac{\bar{C}}{\epsilon}\right)$  is defined in Corollary 1. Then  $\{x_i^{(N(\epsilon))}\}_{i \in \mathcal{N}}$ , satisfies

$$\mathbf{P}(\epsilon) := \mathbb{P}\left(\left|\sum_{i \in \mathcal{N}} F_i\left(x_i^{(N(\epsilon))}\right) - F^*\right| \leq \epsilon, \text{ and } \max_{(i,j) \in \mathcal{E}} \{\|x_i^{(N(\epsilon))} - x_j^{(N(\epsilon))}\|_2\} \leq \epsilon\right) \geq 1 - p,$$

and  $\mathcal{O}\left(\frac{1}{\epsilon} \log\left(\frac{1}{p}\right)\right)$   $\mathbf{ARBCD}$  iterations are required to compute  $\{x_i^{(N(\epsilon))}\}_{i \in \mathcal{N}}$ .

*Proof.* Consider the  $k$ -th  $\mathbf{DFAL}$  subproblem  $\min P^{(k)}(\mathbf{x}) := \lambda^{(k)} \sum_{i \in \mathcal{N}} \rho_i(x_i) + f^{(k)}(\mathbf{x})$ , where  $f^{(k)}$  is defined in (8). Let  $\tilde{L}_i^{(k)} := \lambda^{(k)} L_{\gamma_i} + d_i$  for all  $i \in \mathcal{N}$ . Then it can be easily shown that  $f^{(k)}$  satisfies (36) with constants  $\{\tilde{L}_i^{(k)}\}_{i \in \mathcal{N}}$  for all  $1 \leq k \leq N(\epsilon)$ . Hence,  $\mathbf{ARBCD}$  algorithm can be used to solve  $\min P^{(k)}(\mathbf{x})$  with the iteration complexity given in Lemma 8. Consider the random event

$$\Delta := \bigcap_{k=1}^{N(\epsilon)} \left\{ P^{(k)}(\mathbf{x}^{(k)}) - P^{(k)}(\mathbf{x}_*^{(k)}) \leq \alpha^{(k)} \quad \mathbf{or} \quad \exists g_i^{(k)} \in \partial_{x_i} P^{(k)}(\mathbf{x})|_{\mathbf{x}=\mathbf{x}^{(k)}} \text{ s.t. } \max_{i \in \mathcal{N}} \|g_i^{(k)}\|_2 \leq \frac{\epsilon^{(k)}}{\sqrt{N}} \right\}. \quad (40)$$

Clearly, for all random sequences  $\{\mathbf{x}^{(k)}\}_{k=1}^{N(\epsilon)}$  satisfying random event  $\Delta$ , Corollary 1 implies that  $\left|\sum_{i \in \mathcal{N}} F_i\left(x_i^{(N(\epsilon))}\right) - F^*\right| \leq \epsilon$  and  $\max_{(i,j) \in \mathcal{E}} \{\|x_i^{(N(\epsilon))} - x_j^{(N(\epsilon))}\|_2\} \leq \epsilon$ . Hence, we have

$$\mathbf{P}(\epsilon) \geq \mathbb{P}(\Delta) \geq \prod_{k=1}^{N(\epsilon)} \mathbb{P}\left(P^{(k)}(\mathbf{x}^{(k)}) - P^{(k)}(\mathbf{x}_*^{(k)}) \leq \alpha^{(k)}\right) \geq 1 - p.$$

In the rest, we bound the total number of  $\mathbf{ARBCD}$  iterations required by asynchronous variant of  $\mathbf{DFAL}$  to compute  $\mathbf{x}^{(N(\epsilon))}$ . Note that  $(1 - p)^{\frac{1}{N(\epsilon)}}$  is a concave function for  $p \in (0, 1)$ , and we have  $(1 - p)^{\frac{1}{N(\epsilon)}} \leq 1 - \frac{p}{N(\epsilon)}$ . Therefore, Lemma 8 and the discussion after Lemma 8 together imply that the number of  $\mathbf{ARBCD}$  iterations,  $N^{(k)}$ , to compute  $\mathbf{x}^{(k)}$  satisfying either (39) or (9)(b) is bounded above for  $1 \leq k \leq N(\epsilon)$  as follows

$$N^{(k)} \leq 2N\sqrt{\frac{2C^{(k)}}{\alpha^{(k)}}} \log\left(\frac{N(\epsilon)}{p}\right) = 2N\left(\log\left(\frac{1}{p}\right) + \log\log_{\frac{1}{\epsilon}}\left(\frac{\bar{C}}{\epsilon}\right)\right) \sqrt{\frac{2C^{(k)}}{\alpha^{(k)}}}, \quad (41)$$

with  $C^{(k)} = P^{(k)}(\mathbf{x}^{(k-1)}) - P^{(k)}(\mathbf{x}_*^{(k)}) + \sum_{i \in \mathcal{N}} \frac{\tilde{L}_i^{(k)}}{2} \|x_i^{(k-1)} - x_{*i}^{(k)}\|_2^2$ .

Convexity of  $\{\rho_i\}_{i \in \mathcal{N}}$ , and Lemma 2 imply that

$$P^{(k)}(\mathbf{x}^{(k-1)}) - P^{(k)}(\mathbf{x}_*^{(k)}) \leq \left\langle \lambda^{(k)} s^{(k)} + \nabla f^{(k)}(\mathbf{x}_*^{(k)}), \mathbf{x}^{(k-1)} - \mathbf{x}_*^{(k)} \right\rangle + \sum_{i \in \mathcal{N}} \frac{L_i^{(k)}}{2} \|x_i^{(k-1)} - x_{*i}^{(k)}\|_2^2,$$

where  $s^{(k)} \in \partial \lambda^{(k)} \bar{\rho}(\mathbf{x})|_{\mathbf{x}=\mathbf{x}^{(k-1)}}$ , and  $\bar{\rho}(\mathbf{x}) = \sum_{i \in \mathcal{N}} \rho_i(x_i)$ . Note that optimality conditions imply that  $-\nabla f^{(k)}(\mathbf{x}_*^{(k)}) \in \partial \lambda^{(k)} \bar{\rho}(\mathbf{x})|_{\mathbf{x}=\mathbf{x}_*^{(k)}}$ . Assumption 1 implies that  $\|\nabla_{x_i} f^{(k)}(\mathbf{x}_*^{(k)})\|_2 \leq \lambda^{(k)} B_i$  and  $\|s_i^{(k)}\|_2 \leq \lambda^{(k)} B_i$  for all  $i \in \mathcal{N}$ . Hence, for some  $\tilde{C} > 0$ , we have  $C^{(k)} \leq \sum_{i \in \mathcal{N}} \left( \frac{L_i^{(k)} + \tilde{L}_i^{(k)}}{2} + 2\lambda^{(k)} B_i \right) \|x_i^{(k-1)} - x_{*i}^{(k)}\|_2^2 \leq \tilde{C} B_x^2$  for all  $k \geq 1$ . Consequently, we can bound the total number of **ARBCD** iterations to compute  $\mathbf{x}^{(N(\epsilon))}$  as follows:

$$\sum_{k=1}^{N(\epsilon)} N^{(k)} \leq 2NB_x \sqrt{\frac{2\tilde{C}}{\alpha^{(0)}}} \left( \log \left( \frac{1}{p} \right) + \log \log_{\frac{1}{c}} \left( \frac{\tilde{C}}{\epsilon} \right) \right) \sum_{k=1}^{N(\epsilon)} c^{-k}.$$

Since  $N(\epsilon) = \log_{\frac{1}{c}}(\tilde{C}/\epsilon)$ , and  $\sum_{k=1}^{N(\epsilon)} c^{-k} = \frac{(\frac{1}{c})^{N(\epsilon)} - 1}{1 - c} = \tilde{C}\epsilon^{-1}/(1 - c)$ . Hence, we can conclude that  $\sum_{k=1}^{N(\epsilon)} N^{(k)} = \mathcal{O} \left( \frac{1}{\epsilon} \left( \log \left( \frac{1}{p} \right) + \log \log \left( \frac{1}{\epsilon} \right) \right) \right)$
